# Supplementary material for: Variation in a Darwin Wasp (Hymenoptera: Ichneumonidae) Community along an Elevation Gradient in a Tropical Biodiversity Hotspot: Implications for Ecology and Conservation
Source: MDPI journal article supplement (doi:10.3390/insects14110861), 2023-11-07
Supplement: s1 [file s1]

Table S1. Linear models of pimpline community metrics (response variable) against elevation at site level (n = 15). Model coefficients are given for the predictor variables, \*significant predictor. Models within two AICc units of the model with the lowest AICc are in bold.

| Response variable                               | Intercept     | Elevation                        | Elevation <sup>2</sup>           | Elevation <sup>3</sup>           | Elevation <sup>4</sup>     | Model $R^2$  | AICc           |
|-------------------------------------------------|---------------|----------------------------------|----------------------------------|----------------------------------|----------------------------|--------------|----------------|
| Abundance                                       | 109.64*       | -0.0049                          |                                  |                                  |                            | 0.004        | 169.64         |
|                                                 | <b>39.56</b>  | <b>0.1752</b>                    | <b>-7.834 x 10<sup>-5</sup></b>  |                                  |                            | <b>0.284</b> | <b>168.49</b>  |
|                                                 | <b>124.9</b>  | <b>0.2458</b>                    | <b>3.844 x 10<sup>-4</sup></b>   | <b>-1.371 x 10<sup>-7</sup>*</b> |                            | <b>0.509</b> | <b>167.50</b>  |
|                                                 | 112.6         | 0.1577                           | 2.22 3x 10 <sup>-4</sup>         | -2.959 x 10 <sup>-8</sup>        | -2.339 x 10 <sup>-11</sup> | 0.511        | 173.28         |
| Log <sub>10</sub> Species Richness              | 1.599*        | -2.678 x 10 <sup>-4</sup> *      |                                  |                                  |                            | 0.385        | 5.472          |
|                                                 | <b>1.221*</b> | <b>7.036 x 10<sup>-4</sup>*</b>  | <b>-4.225 x 10<sup>-7</sup>*</b> |                                  |                            | <b>0.670</b> | <b>-0.0589</b> |
|                                                 | <b>1.500*</b> | <b>-6.7125 x 10<sup>-4</sup></b> | <b>1.088 x 10<sup>-6</sup></b>   | <b>-4.476 x 10<sup>-10</sup></b> |                            | <b>0.754</b> | <b>0.2096</b>  |
|                                                 | 1.398*        | 5.771 x 10 <sup>-5</sup>         | -2.518 x 10 <sup>-7</sup>        | 4.414 x 10 <sup>-10</sup>        | -1.935 x 10 <sup>-13</sup> | 0.759        | 5.759          |
| Log <sub>10</sub> Inverse Simpson's Index (1/D) | <b>1.230*</b> | <b>-4.056 x 10<sup>-4</sup>*</b> |                                  |                                  |                            | <b>0.601</b> | <b>4.77</b>    |
|                                                 | 1.068*        | 1.043 x 10 <sup>-5</sup>         | -1.089 x 10 <sup>-7</sup>        |                                  |                            | 0.637        | 7.18           |
|                                                 | 0.9665*       | 5.137 x 10 <sup>-4</sup>         | -7.34 x 10 <sup>-7</sup>         | 1.639 x 10 <sup>-10</sup>        |                            | 0.644        | 11.53          |
|                                                 | 0.9057        | 9.503 x 10 <sup>-4</sup>         | -1.537 x 10 <sup>-6</sup>        | 6.964 x 10 <sup>-10</sup>        | -1.159 x 10 <sup>-13</sup> | 0.645        | 17.32          |
| Shannon Index                                   | <b>3.240*</b> | <b>-0.00087*</b>                 |                                  |                                  |                            | <b>0.621</b> | <b>26.44</b>   |
|                                                 | <b>2.640*</b> | <b>6.728 x 10<sup>-4</sup></b>   | <b>-6.715 x 10<sup>-7</sup>*</b> |                                  |                            | <b>0.731</b> | <b>25.13</b>   |
|                                                 | 2.739*        | 1.8 x 10 <sup>-4</sup>           | -1.299 x 10 <sup>-7</sup>        | -1.605 x 10 <sup>-10</sup>       |                            | 0.732        | 29.71          |
|                                                 | 2.561*        | 1.462x10 <sup>-3</sup>           | -2.488 x 10 <sup>-6</sup>        | 1.404 x 10 <sup>-9</sup>         | -3.403 x 10 <sup>-13</sup> | 0.734        | 35.42          |

Table S2. Bray-Curtis dissimilarity scores across the 15 sites.

| Site | 1     | 2     | 3     | 4     | 5     | 6     | 7     | 8     |
|------|-------|-------|-------|-------|-------|-------|-------|-------|
| 2    | 0.571 | 0     |       |       |       |       |       |       |
| 3    | 0.677 | 0.542 | 0     |       |       |       |       |       |
| 4    | 0.560 | 0.651 | 0.514 | 0     |       |       |       |       |
| 5    | 0.818 | 0.752 | 0.703 | 0.698 | 0     |       |       |       |
| 6    | 0.725 | 0.718 | 0.602 | 0.515 | 0.631 | 0     |       |       |
| 7    | 0.746 | 0.815 | 0.701 | 0.628 | 0.763 | 0.651 | 0     |       |
| 8    | 0.753 | 0.903 | 0.840 | 0.773 | 0.929 | 0.794 | 0.529 | 0     |
| 9    | 0.842 | 0.915 | 0.865 | 0.835 | 0.937 | 0.845 | 0.731 | 0.666 |
| 10   | 0.920 | 0.953 | 0.917 | 0.887 | 0.940 | 0.869 | 0.731 | 0.668 |
| 11   | 0.959 | 0.980 | 0.880 | 0.894 | 0.918 | 0.841 | 0.816 | 0.646 |
| 12   | 0.972 | 0.982 | 0.922 | 0.910 | 0.952 | 0.905 | 0.809 | 0.680 |
| 13   | 0.988 | 0.977 | 0.934 | 0.910 | 0.967 | 0.904 | 0.831 | 0.703 |
| 14   | 1.000 | 0.985 | 0.953 | 0.944 | 1.000 | 0.887 | 0.826 | 0.519 |
| 15   | 1.000 | 1.000 | 0.971 | 0.973 | 1.000 | 0.912 | 0.828 | 0.740 |

Table S2 continued

| Site | 9     | 10    | 11    | 12    | 13    | 14    | 15 |
|------|-------|-------|-------|-------|-------|-------|----|
| 10   | 0.421 | 0     |       |       |       |       |    |
| 11   | 0.487 | 0.394 | 0     |       |       |       |    |
| 12   | 0.456 | 0.416 | 0.273 | 0     |       |       |    |
| 13   | 0.804 | 0.697 | 0.579 | 0.522 | 0     |       |    |
| 14   | 0.715 | 0.640 | 0.485 | 0.564 | 0.556 | 0     |    |
| 15   | 0.884 | 0.862 | 0.746 | 0.819 | 0.694 | 0.536 | 0  |

Table S3. Bray-Curtis dissimilarity scores between the 30 traps.

| Trap | 1A    | 1B    | 2A    | 2B    | 3A    | 3B    | 4A    | 4B    |
|------|-------|-------|-------|-------|-------|-------|-------|-------|
| 1A   | 0     |       |       |       |       |       |       |       |
| 1B   | 0.675 | 0     |       |       |       |       |       |       |
| 2A   | 0.607 | 0.639 | 0     |       |       |       |       |       |
| 2B   | 0.670 | 0.711 | 0.566 | 0     |       |       |       |       |
| 3A   | 0.723 | 0.640 | 0.605 | 0.586 | 0     |       |       |       |
| 3B   | 0.755 | 0.788 | 0.667 | 0.617 | 0.627 | 0     |       |       |
| 4A   | 0.624 | 0.738 | 0.656 | 0.695 | 0.587 | 0.648 | 0     |       |
| 4B   | 0.784 | 0.630 | 0.787 | 0.714 | 0.623 | 0.571 | 0.489 | 0     |
| 5A   | 1.000 | 1.000 | 1.000 | 0.965 | 0.933 | 0.969 | 0.910 | 0.941 |
| 5B   | 0.719 | 0.886 | 0.893 | 0.728 | 0.833 | 0.636 | 0.780 | 0.717 |
| 6A   | 0.639 | 0.730 | 0.733 | 0.720 | 0.650 | 0.589 | 0.545 | 0.514 |
| 6B   | 0.781 | 0.943 | 0.893 | 0.827 | 0.786 | 0.682 | 0.670 | 0.674 |
| 7A   | 0.810 | 0.848 | 0.864 | 0.818 | 0.753 | 0.800 | 0.699 | 0.662 |
| 7B   | 0.750 | 0.691 | 0.833 | 0.785 | 0.710 | 0.750 | 0.695 | 0.606 |
| 8A   | 0.904 | 0.775 | 0.920 | 0.940 | 0.845 | 0.925 | 0.818 | 0.784 |
| 8B   | 0.863 | 0.696 | 0.908 | 0.911 | 0.785 | 0.918 | 0.820 | 0.743 |
| 9A   | 0.919 | 0.843 | 0.927 | 0.937 | 0.846 | 0.898 | 0.859 | 0.810 |
| 9B   | 0.920 | 0.908 | 0.932 | 0.944 | 0.931 | 0.946 | 0.908 | 0.895 |
| 10A  | 0.929 | 0.966 | 0.962 | 0.969 | 0.880 | 0.927 | 0.886 | 0.872 |

Table S3 continued

| Trap | 1A    | 1B    | 2A    | 2B    | 3A    | 3B    | 4A    | 4B    |
|------|-------|-------|-------|-------|-------|-------|-------|-------|
| 10B  | 0.924 | 0.957 | 0.984 | 0.946 | 0.947 | 0.949 | 0.937 | 0.913 |
| 11A  | 0.970 | 0.973 | 0.966 | 1.000 | 0.931 | 0.934 | 0.915 | 0.937 |
| 11B  | 0.967 | 0.953 | 0.983 | 0.986 | 0.916 | 0.878 | 0.933 | 0.881 |
| 12A  | 0.980 | 1.000 | 1.000 | 1.000 | 0.950 | 0.952 | 0.953 | 0.938 |

|     |       |       |       |       |       |       |       |       |
|-----|-------|-------|-------|-------|-------|-------|-------|-------|
| 12B | 0.946 | 1.000 | 0.981 | 0.969 | 0.893 | 0.926 | 0.899 | 0.885 |
| 13A | 0.972 | 0.974 | 0.968 | 0.977 | 0.934 | 0.937 | 0.959 | 0.919 |
| 13B | 1.000 | 1.000 | 1.000 | 0.982 | 0.931 | 0.950 | 0.951 | 0.903 |
| 14A | 1.000 | 1.000 | 0.966 | 1.000 | 0.931 | 0.934 | 0.957 | 0.895 |
| 14B | 1.000 | 1.000 | 1.000 | 1.000 | 0.974 | 0.976 | 1.000 | 0.953 |
| 15A | 1.000 | 1.000 | 1.000 | 1.000 | 0.972 | 0.974 | 1.000 | 0.950 |
| 15B | 1.000 | 1.000 | 1.000 | 1.000 | 0.967 | 1.000 | 1.000 | 1.000 |

Table S3 continued

| Trap | 5A    | 5B    | 6A    | 6B    | 7A    | 7B    | 8A    | 8B    |
|------|-------|-------|-------|-------|-------|-------|-------|-------|
| 5B   | 0.933 | 0     |       |       |       |       |       |       |
| 6A   | 0.918 | 0.726 | 0     |       |       |       |       |       |
| 6B   | 0.800 | 0.667 | 0.479 | 0     |       |       |       |       |
| 7A   | 0.957 | 0.793 | 0.659 | 0.724 | 0     |       |       |       |
| 7B   | 0.971 | 0.723 | 0.699 | 0.766 | 0.500 | 0     |       |       |
| 8A   | 0.959 | 0.972 | 0.783 | 0.918 | 0.674 | 0.575 | 0     |       |
| 8B   | 0.949 | 0.905 | 0.756 | 0.905 | 0.600 | 0.495 | 0.390 | 0     |
| 9A   | 0.986 | 0.914 | 0.845 | 0.914 | 0.750 | 0.752 | 0.657 | 0.766 |
| 9B   | 1.000 | 0.965 | 0.851 | 0.965 | 0.751 | 0.781 | 0.582 | 0.742 |
| 10A  | 1.000 | 0.981 | 0.852 | 0.922 | 0.733 | 0.790 | 0.557 | 0.768 |

Table S3 continued.

| Trap | 5A    | 5B    | 6A    | 6B    | 7A    | 7B    | 8A    | 8B    |
|------|-------|-------|-------|-------|-------|-------|-------|-------|
| 10B  | 1.000 | 0.902 | 0.872 | 0.934 | 0.728 | 0.815 | 0.645 | 0.786 |
| 11A  | 0.939 | 0.965 | 0.868 | 0.895 | 0.832 | 0.753 | 0.474 | 0.670 |
| 11B  | 0.978 | 0.929 | 0.848 | 0.876 | 0.863 | 0.856 | 0.621 | 0.836 |
| 12A  | 1.000 | 0.978 | 0.890 | 0.978 | 0.842 | 0.831 | 0.578 | 0.798 |
| 12B  | 1.000 | 0.921 | 0.867 | 0.941 | 0.828 | 0.816 | 0.600 | 0.782 |
| 13A  | 1.000 | 0.967 | 0.850 | 0.967 | 0.821 | 0.822 | 0.725 | 0.743 |

|     |       |       |       |       |       |       |       |       |
|-----|-------|-------|-------|-------|-------|-------|-------|-------|
| 13B | 0.968 | 0.977 | 0.886 | 0.954 | 0.851 | 0.857 | 0.733 | 0.789 |
| 14A | 1.000 | 1.000 | 0.842 | 0.895 | 0.815 | 0.835 | 0.447 | 0.727 |
| 14B | 1.000 | 1.000 | 0.881 | 0.958 | 0.855 | 0.841 | 0.493 | 0.719 |
| 15A | 1.000 | 1.000 | 0.902 | 0.953 | 0.846 | 0.829 | 0.672 | 0.686 |
| 15B | 1.000 | 1.000 | 0.959 | 1.000 | 0.935 | 0.914 | 0.878 | 0.846 |

Table S3 continued

| Trap | 9A    | 9B    | 10A   | 10B   | 11A   | 11B   | 12A   | 12B   |
|------|-------|-------|-------|-------|-------|-------|-------|-------|
| 9B   | 0.381 | 0     |       |       |       |       |       |       |
| 10A  | 0.592 | 0.549 | 0     |       |       |       |       |       |
| 10B  | 0.461 | 0.322 | 0.392 | 0     |       |       |       |       |
| 11A  | 0.709 | 0.644 | 0.547 | 0.632 | 0     |       |       |       |
| 11B  | 0.448 | 0.414 | 0.531 | 0.392 | 0.569 | 0     |       |       |
| 12A  | 0.606 | 0.483 | 0.511 | 0.430 | 0.484 | 0.356 | 0     |       |
| 12B  | 0.455 | 0.358 | 0.507 | 0.361 | 0.558 | 0.225 | 0.255 | 0     |
| 13A  | 0.799 | 0.770 | 0.673 | 0.690 | 0.563 | 0.583 | 0.464 | 0.574 |
| 13B  | 0.835 | 0.810 | 0.704 | 0.727 | 0.640 | 0.614 | 0.508 | 0.609 |
| 14A  | 0.733 | 0.661 | 0.585 | 0.664 | 0.333 | 0.586 | 0.527 | 0.577 |
| 14B  | 0.782 | 0.688 | 0.649 | 0.707 | 0.294 | 0.626 | 0.548 | 0.600 |
| 15A  | 0.853 | 0.806 | 0.780 | 0.818 | 0.511 | 0.723 | 0.718 | 0.753 |
| 15B  | 0.957 | 0.934 | 0.924 | 0.939 | 0.818 | 0.933 | 0.909 | 0.922 |

Table S3 continued

| Trap | 13A   | 13B   | 14A   | 14B   | 15A   |
|------|-------|-------|-------|-------|-------|
| 13B  | 0.355 | 0     |       |       |       |
| 14A  | 0.531 | 0.618 | 0     |       |       |
| 14B  | 0.455 | 0.575 | 0.177 | 0     |       |
| 15A  | 0.429 | 0.622 | 0.422 | 0.278 | 0     |
| 15B  | 0.838 | 0.903 | 0.818 | 0.750 | 0.667 |

Table S4. Correlation matrix of community properties and habitat variables at site level (n = 15). Values above and to the right the diagonal are values of Spearman's Rho, whilst those below and to the left are *P* values (asterisk and bold indicates if still significant after False Discovery Rate correction for multiple comparisons). For variable definitions see Methods.

|                       | Abundance | Richness     | Inverse<br>Simpson's | Shannon      | Elevation               | Mean<br>temp.           |
|-----------------------|-----------|--------------|----------------------|--------------|-------------------------|-------------------------|
| Abundance             |           | <b>0.717</b> | 0.250                | 0.357        | -0.054                  | 0.050                   |
| Richness              | 0.00264*  |              | <b>0.751</b>         | <b>0.866</b> | -0.554                  | 0.566                   |
| Inverse<br>Simpson's  | 0.368     | 0.00125*     |                      | <b>0.968</b> | <b>-0.793</b>           | <b>0.811</b>            |
| Shannon               | 0.192     | 0.00003*     | <0.00001*            |              | <b>-0.768</b>           | <b>0.782</b>            |
| Elevation             | 0.853     | 0.0322       | 0.000674*            | 0.001282*    |                         | <b>-0.993</b>           |
| Mean temp.            | 0.863     | 0.0277       | 0.000386*            | 0.000902*    | <0.00001*               |                         |
| Max. temp.            | 0.863     | 0.0546       | 0.00177*             | 0.00238*     | <0.00001*               | <0.00001*               |
| Min. temp.            | 0.812     | 0.0329       | 0.000435*            | 0.00128*     | <0.00001*               | <0.00001*               |
| Temp. amp.            | 0.532     | 0.0724       | 0.00813*             | 0.0111*      | 0.0286                  | 0.0275                  |
| Humidity              | 0.940     | 0.437        | 0.899                | 0.528        | 0.405                   | 0.532                   |
| Litter dry<br>mass    | 0.658     | 0.350        | 0.0834               | 0.126        | 0.541                   | 0.482                   |
| % Litter<br>moisture  | 0.773     | 0.125        | 0.000988*            | 0.00313*     | <0.00001*               | <0.00001*               |
| Large Tree<br>density | 0.161     | 0.285        | 0.696                | 0.608        | 0.617                   | 0.617                   |
| Small Tree<br>density | 0.602     | 0.404        | 0.834                | 0.756        | 0.955                   | 0.869                   |
| Palm density          | 0.493     | 0.153        | 0.101                | 0.0950       | 0.166                   | 0.137                   |
| Tree fern<br>density  | 0.491     | 0.294        | 0.205                | 0.156        | 0.407                   | 0.491                   |
| Bamboo cover          | 0.805     | 0.0441       | 0.000174*            | 0.000626*    | 5.28x10 <sup>-6</sup> * | 6.67x10 <sup>-6</sup> * |
| Fern cover            | 0.577     | 0.0308       | 0.00133*             | 0.00177*     | 0.000508*               | 0.000589*               |
| Herb cover            | 0.150     | 0.00546*     | 0.00336*             | 0.000956*    | 0.212                   | 0.204                   |
| Epiphyte<br>density   | 0.825     | 0.0876       | 0.000209*            | 0.00124*     | 5.63x10 <sup>-5</sup> * | 2.35x10 <sup>-5</sup> * |

|               |       |        |        |        |        |         |
|---------------|-------|--------|--------|--------|--------|---------|
| Liana density | 0.775 | 0.0486 | 0.0549 | 0.0311 | 0.0172 | 0.0145* |
|---------------|-------|--------|--------|--------|--------|---------|

Table S4 continued

|                       | Max.<br>temp.           | Min.<br>temp.           | Temp.<br>amp. | Humidity | Litter dry<br>mass | % Litter<br>moisture |
|-----------------------|-------------------------|-------------------------|---------------|----------|--------------------|----------------------|
| Abundance             | -0.043                  | 0.068                   | -0.175        | 0.021    | 0.125              | 0.082                |
| Richness              | 0.505                   | 0.552                   | -0.477        | 0.217    | 0.260              | -0.414               |
| Inverse<br>Simpson's  | <b>0.754</b>            | <b>0.807</b>            | <b>-0.668</b> | 0.0357   | 0.464              | <b>-0.779</b>        |
| Shannon               | <b>0.739</b>            | <b>0.768</b>            | <b>-0.646</b> | 0.177    | 0.414              | <b>-0.725</b>        |
| Elevation             | <b>-0.975</b>           | <b>-0.986</b>           | 0.571         | -0.232   | -0.171             | <b>0.889</b>         |
| Mean temp.            | <b>0.982</b>            | <b>0.993</b>            | -0.575        | 0.175    | 0.196              | <b>-0.900</b>        |
| Max. temp.            |                         | <b>0.971</b>            | -0.511        | 0.248    | 0.100              | <b>-0.893</b>        |
| Min. temp.            | <0.00001*               |                         | -0.618        | 0.127    | 0.175              | <b>-0.907</b>        |
| Temp. amp.            | 0.0543                  | 0.0163                  |               | -0.043   | -0.400             | <b>0.621</b>         |
| Humidity              | 0.372                   | 0.652                   | 0.879         |          | -0.320             | 0.030                |
| Litter mass           | 0.724                   | 0.532                   | 0.141         | 0.245    |                    | -0.311               |
| Litter moisture       | <0.00001*               | <0.00001*               | 0.0156*       | 0.914    | 0.259              |                      |
| Large Tree<br>density | 0.336                   | 0.599                   | 0.221         | 0.653    | 0.0546             | 0.599                |
| Small Tree<br>density | 0.746                   | 0.894                   | 0.805         | 0.899    | 0.311              | 0.498                |
| Palm density          | 0.162                   | 0.0890                  | 0.00874*      | 0.423    | 0.763              | 0.264                |
| Tree fern<br>density  | 0.407                   | 0.491                   | 0.330         | 0.0463   | 0.407              | 0.407                |
| Bamboo cover          | 3.31x10 <sup>-5</sup> * | 3.21x10 <sup>-5</sup> * | 0.000694*     | 0.342    | 0.512              | 0.000116*            |
| Fern cover            | 0.000982*               | 0.000618*               | 0.0266        | 0.843    | 0.160              | 0.00223*             |
| Herb cover            | 0.276                   | 0.258                   | 0.0849        | 0.680    | 0.00587*           | 0.154                |
| Epiphyte<br>density   | 8.63x10 <sup>-5</sup> * | 1.03x10 <sup>-5</sup> * | 0.000697*     | 0.737    | 0.145              | 0.000197*            |
| Liana density         | 0.0149*                 | 0.0138*                 | 0.0359        | 0.0977   | 0.800              | 0.117                |

Table S4 continued

|                    | Large tree density | Small Tree density | Palm density | Tree fern density | Bamboo cover            | Fern cover    |
|--------------------|--------------------|--------------------|--------------|-------------------|-------------------------|---------------|
| Abundance          | 0.381              | 0.147              | 0.192        | 0.193             | -0.070                  | -0.157        |
| Richness           | 0.295              | 0.232              | 0.388        | 0.290             | -0.526                  | -0.557        |
| Inverse Simpson's  | 0.110              | 0.059              | 0.439        | 0.347             | <b>-0.821</b>           | <b>-0.748</b> |
| Shannon            | 0.144              | 0.088              | 0.447        | 0.386             | <b>-0.779</b>           | <b>-0.736</b> |
| Elevation          | 0.141              | 0.016              | -0.377       | -0.231            | <b>0.899</b>            | <b>0.786</b>  |
| Mean temp.         | -0.141             | -0.047             | 0.402        | 0.193             | <b>-0.895</b>           | <b>-0.781</b> |
| Max. temp.         | -0.267             | -0.091             | 0.380        | 0.231             | <b>-0.864</b>           | <b>-0.761</b> |
| Min. temp.         | -0.148             | -0.038             | 0.454        | 0.193             | <b>-0.906</b>           | <b>-0.779</b> |
| Temp. amp.         | -0.336             | 0.070              | -0.650       | -0.270            | <b>0.775</b>            | 0.570         |
| Humidity           | -0.126             | 0.036              | 0.224        | 0.521             | -0.264                  | -0.056        |
| Litter mass        | 0.505              | -0.281             | 0.085        | -0.231            | -0.184                  | -0.382        |
| Litter moisture    | 0.148              | 0.190              | -0.308       | -0.231            | <b>0.833</b>            | <b>0.725</b>  |
| Large Tree density |                    | 0.373              | -0.042       | -0.234            | 0.0411                  | -0.098        |
| Small Tree density | 0.170              |                    | -0.097       | -0.135            | 0.064                   | -0.070        |
| Palm density       | 0.882              | 0.731              |              | 0.199             | -0.579                  | -0.228        |
| Tree fern density  | 0.401              | 0.631              | 0.476        |                   | -0.439                  | -0.078        |
| Bamboo cover       | 0.884              | 0.821              | 0.0238       | 0.101             |                         | <b>0.734</b>  |
| Fern cover         | 0.729              | 0.803              | 0.413        | 0.783             | 0.00186*                |               |
| Herb cover         | 0.118              | 0.962              | 0.582        | 0.259             | 0.111                   | 0.0117*       |
| Epiphyte density   | 0.941              | 0.703              | 0.00595*     | 0.681             | 7.63x10 <sup>-6</sup> * | 0.00175*      |
| Liana density      | 0.761              | 0.334              | 0.00678*     | 0.490             | 0.0128*                 | 0.234         |

Table S4 continued

|           | Herb cover | Epiphyte density | Liana density |
|-----------|------------|------------------|---------------|
| Abundance | -0.391     | 0.063            | 0.081         |



|                    |               |               |               |
|--------------------|---------------|---------------|---------------|
| Richness           | <b>-0.678</b> | -0.456        | 0.517         |
| Inverse Simpson's  | <b>-0.705</b> | <b>-0.816</b> | 0.505         |
| Shannon            | <b>-0.762</b> | <b>-0.751</b> | 0.557         |
| Elevation          | 0.342         | <b>0.852</b>  | -0.603        |
| Mean temp.         | -0.348        | <b>-0.871</b> | 0.616         |
| Max. temp.         | -0.301        | <b>-0.841</b> | 0.614         |
| Min temp.          | -0.312        | <b>-0.887</b> | 0.620         |
| Temp amp.          | 0.459         | <b>0.775</b>  | -0.544        |
| Humidity           | -0.116        | -0.095        | 0.444         |
| Litter dry mass    | <b>-0.674</b> | -0.395        | -0.072        |
| % Litter moisture  | 0.387         | <b>0.818</b>  | -0.423        |
| Large tree density | -0.421        | 0.021         | 0.086         |
| Small Tree density | 0.014         | 0.108         | 0.268         |
| Palm density       | -0.155        | <b>-0.673</b> | <b>0.665</b>  |
| Tree fern density  | -0.311        | -0.116        | 0.193         |
| Bamboo cover       | 0.429         | <b>0.893</b>  | <b>-0.624</b> |
| Fern cover         | <b>0.631</b>  | <b>0.736</b>  | -0.327        |
| Herb cover         |               | 0.404         | -0.140        |
| Epiphyte density   | 0.135         |               | <b>-0.659</b> |
| Liana density      | 0.619         | 0.00752*      |               |

---

Table S5. Correlation matrix of community properties and habitat variables at trap level (n = 30). Values above and to the right the diagonal are values of Spearman's Rho, whilst those below and to the left are *P* values (asterisk and bold indicates if still significant after False Discovery Rate correction for multiple comparisons). For variable definitions see Methods text.

|                         | Abundance               | Species richness         | Inverse Simpson's index | Shannon index           | Elevation                | Litter dry mass |
|-------------------------|-------------------------|--------------------------|-------------------------|-------------------------|--------------------------|-----------------|
| Abundance               |                         | <b>0.757</b>             | 0.289                   | <b>0.460</b>            | -0.080                   | 0.072           |
| Species richness        | 1.29x10 <sup>-6</sup> * |                          | <b>0.720</b>            | <b>0.866</b>            | <b>-0.516</b>            | 0.135           |
| Inverse Simpson's index | 0.121                   | 7.33x10 <sup>-6</sup> *  |                         | <b>0.954</b>            | <b>-0.742</b>            | 0.293           |
| Shannon index           | 0.0106*                 | 6.62x10 <sup>-10</sup> * | < 0.0001*               |                         | <b>-0.728</b>            | 0.194           |
| Elevation               | 0.676                   | 0.00354*                 | 2.65x10 <sup>-6</sup> * | 5.21x10 <sup>-6</sup> * |                          | -0.069          |
| Litter dry mass         | 0.705                   | 0.477                    | 0.116                   | 0.304                   | 0.717                    |                 |
| % Litter moisture       | 0.657                   | 0.0332                   | 7.51x10 <sup>-6</sup> * | 7.21x10 <sup>-5</sup> * | 2.89x10 <sup>-10</sup> * | 0.346           |
| Large tree density      | 0.447                   | 0.626                    | 0.950                   | 0.937                   | 0.302                    | 0.105           |
| Small tree density      | 0.655                   | 0.705                    | 0.762                   | 0.830                   | 0.742                    | 0.876           |
| Palm density            | 0.148                   | 0.0133                   | 0.0148*                 | 0.0125*                 | 0.0691                   | 0.519           |
| Tree Fern density       | 0.499                   | 0.498                    | 0.436                   | 0.478                   | 0.478                    | 0.0774          |
| Bamboo cover            | 0.831                   | 0.0313                   | 1.27x10 <sup>-5</sup> * | 0.000277*               | 3.74x10 <sup>-9</sup> *  | 0.399           |
| Fern cover              | 0.898                   | 0.0621                   | 0.00530*                | 0.00951*                | 0.00511*                 | 0.759           |
| Herb cover              | 0.0647                  | 0.00634*                 | 0.00446*                | 0.00433*                | 0.204                    | 0.0534          |
| Liana density           | 0.596                   | 0.220                    | 0.128                   | 0.138                   | 0.112                    | 0.974           |
| Epiphyte density        | 0.659                   | 0.0719                   | 0.000372*               | 0.00339*                | 0.000390*                | 0.000390*       |

Table S5. continued

|                               | % Litter<br>moisture    | Large tree<br>density | Small tree<br>density | Palm<br>density | Tree Fern<br>density | Bamboo<br>cover |
|-------------------------------|-------------------------|-----------------------|-----------------------|-----------------|----------------------|-----------------|
| Abundance                     | 0.085                   | 0.144                 | 0.085                 | 0.271           | 0.128                | 0.041           |
| Species<br>richness           | -0.390                  | 0.093                 | 0.072                 | <b>0.447</b>    | 0.129                | -0.394          |
| Inverse<br>Simpson's<br>index | <b>-0.735</b>           | 0.012                 | -0.058                | <b>0.441</b>    | 0.148                | <b>-0.707</b>   |
| Shannon index                 | <b>-0.672</b>           | 0.015                 | -0.041                | <b>0.451</b>    | 0.135                | <b>-0.618</b>   |
| Elevation                     | <b>0.874</b>            | 0.195                 | 0.063                 | -0.336          | -0.135               | <b>0.847</b>    |
| Litter dry mass               | -0.178                  | 0.302                 | -0.030                | 0.122           | -0.327               | -0.160          |
| % Litter<br>moisture          |                         | 0.138                 | 0.191                 | -0.294          | -0.109               | <b>0.798</b>    |
| Large tree<br>density         | 0.466                   |                       | 0.224                 | 0.049           | -0.150               | 0.119           |
| Small tree<br>density         | 0.311                   | 0.233                 |                       | -0.058          | 0.071                | 0.050           |
| Palm density                  | 0.115                   | 0.799                 | 0.760                 |                 | 0.109                | <b>-0.451</b>   |
| Tree Fern<br>density          | 0.566                   | 0.428                 | 0.710                 | 0.568           |                      | -0.293          |
| Bamboo cover                  | 1.32x10 <sup>-7</sup> * | 0.532                 | 0.793                 | 0.0125*         | 0.116                |                 |
| Fern cover                    | 0.00162*                | 0.686                 | 0.622                 | 0.629           | 0.652                | 0.0216          |
| Herb cover                    | 0.0893                  | 0.0227                | 0.823                 | 0.460           | 0.348                | 0.0925          |
| Liana density                 | 0.356                   | 0.673                 | 0.00881*              | 0.340           | 0.0648               | 0.211           |
| Epiphyte<br>density           | 1.39x10 <sup>-5</sup> * | 0.256                 | 0.0865                | 0.00454*        | 1.00                 | 0.000236*       |

Table S5. continued

|                         | Fern cover    | Herb cover    | Liana density | Epiphyte density |
|-------------------------|---------------|---------------|---------------|------------------|
| Abundance               | -0.024        | -0.342        | 0.101         | 0.084            |
| Species richness        | -0.345        | <b>-0.487</b> | 0.231         | -0.333           |
| Inverse Simpson's index | <b>-0.496</b> | <b>-0.505</b> | 0.284         | <b>-0.607</b>    |
| Shannon index           | <b>-0.466</b> | <b>-0.506</b> | 0.278         | <b>-0.518</b>    |
| Elevation               | <b>0.498</b>  | 0.238         | -0.296        | <b>0.606</b>     |
| Litter dry mass         | -0.058        | -0.356        | 0.006         | -0.160           |
| % Litter moisture       | <b>0.551</b>  | 0.316         | -0.175        | <b>0.705</b>     |
| Large tree density      | -0.077        | -0.415        | 0.080         | 0.214            |
| Small tree density      | 0.094         | -0.043        | <b>0.470</b>  | 0.318            |
| Palm density            | -0.092        | -0.140        | 0.181         | <b>-0.504</b>    |
| Tree Fern density       | -0.086        | -0.177        | 0.341         | 0.00             |
| Bamboo cover            | 0.418         | 0.313         | -0.235        | <b>0.623</b>     |
| Fern cover              |               | <b>0.490</b>  | 0.017         | <b>0.590</b>     |
| Herb cover              | 0.00597*      |               | -0.171        | 0.110            |
| Epiphyte density        | 0.928         | 0.367         |               | 0.021            |
| Liana density           | 0.000603*     | 0.564         | 0.910         |                  |

Table S6. Principal Component weightings for the abiotic variables at trap level (n = 30), along with initial eigenvalues and % variance explained. For variable explanations and units, see Methods text. Variables were scaled prior to analysis.

| Variable              | PC1     | PC2     | PC3    | PC4      |
|-----------------------|---------|---------|--------|----------|
| Elevation             | 0.427   | -0.0518 | 0.200  | -0.129   |
| Dry litter mass       | -0.101  | -0.447  | 0.321  | 0.157    |
| % Litter moisture     | 0.424   | 0.0129  | 0.0136 | -0.0104  |
| Large tree density    | -0.0385 | -0.572  | 0.0867 | 0.0160   |
| Small tree density    | 0.149   | -0.428  | -0.455 | 0.0798   |
| Tree fern density     | -0.121  | 0.111   | -0.456 | -0.491   |
| Bamboo ground cover   | 0.421   | 0.0742  | 0.135  | -0.0546  |
| Fern ground cover     | 0.385   | -0.0613 | -0.170 | 0.214    |
| Herb ground cover     | 0.226   | 0.453   | -0.103 | 0.445    |
| Epiphyte density      | -0.0610 | -0.0833 | -0.591 | 0.137    |
| Liana density         | 0.403   | -0.230  | -0.151 | -0.00819 |
| Palm density          | -0.216  | -0.0199 | -0.066 | 0.667    |
| Initial eigenvalue    | 4.133   | 2.026   | 1.676  | 1.078    |
| % variance            | 34.44   | 16.88   | 13.97  | 8.98     |
| % cumulative variance | 34.44   | 51.32   | 65.29  | 74.28    |

Table S7. Best models of pimpline community properties against the abiotic variable Principal Components (PC) in Table S6. Best models were selected on the basis of AICc scores. \*=significant predictor

| Response variable          | Intercept | Predictor variables |                              | Model $R^2$ |
|----------------------------|-----------|---------------------|------------------------------|-------------|
| Abundance                  | 65.73*    | +4.205 x PC1        | -3.436 x PC1*                | 0.225       |
| Log <sub>10</sub> Richness | 1.237*    | -0.0568 x PC1       | -0.0361 x PC1 <sub>2</sub> * | 0.547       |
| Log <sub>10</sub> (1/D)    | 0.711*    | -0.134* x PC1*      | -0.0415 x PC2                | 0.691       |
| Shannon Index              | 2.021*    | -0.297 x PC1*       |                              | 0.634       |

Figure S1.

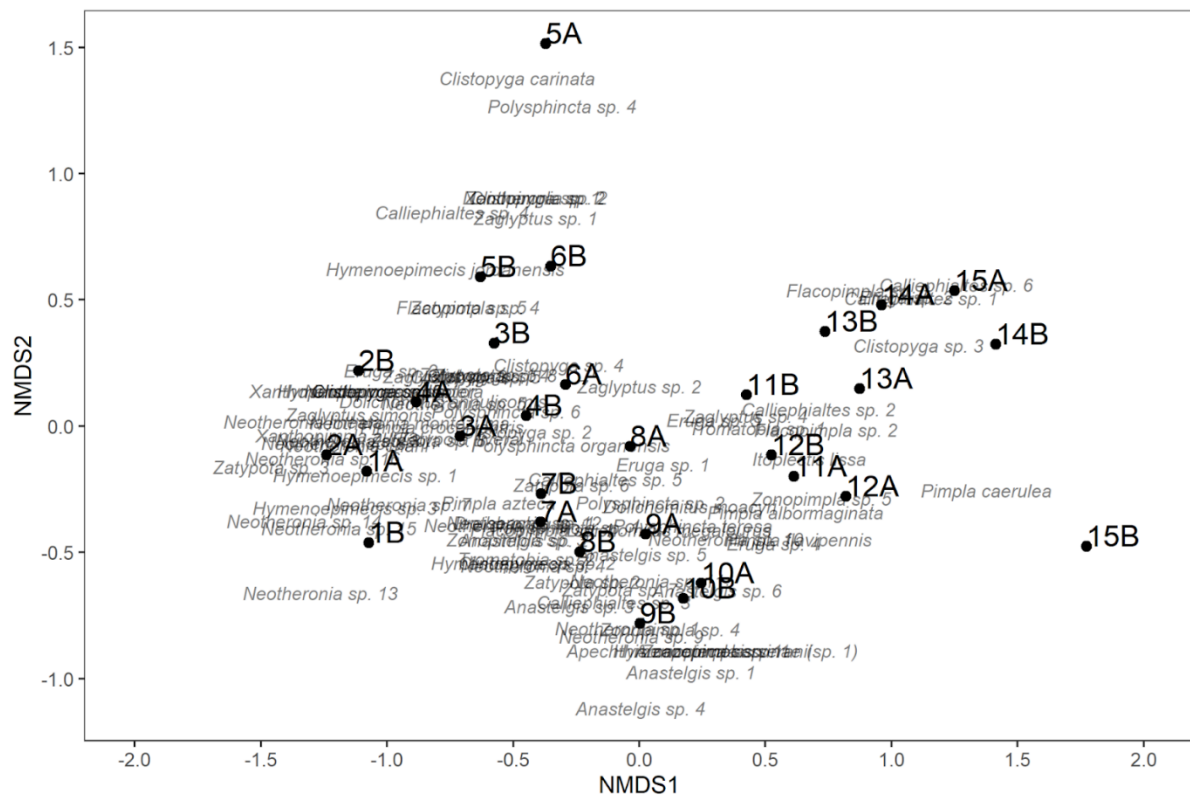

Figure S1. Non-metric Multidimensional Scaling (NMDS) analysis of the pimpline community at the trap level. Black numbers and points indicate the 30 traps at 15 sampling sites going from bottom of the mountain (1) to top (15). Species are in grey, small lettering.

Figure S2.

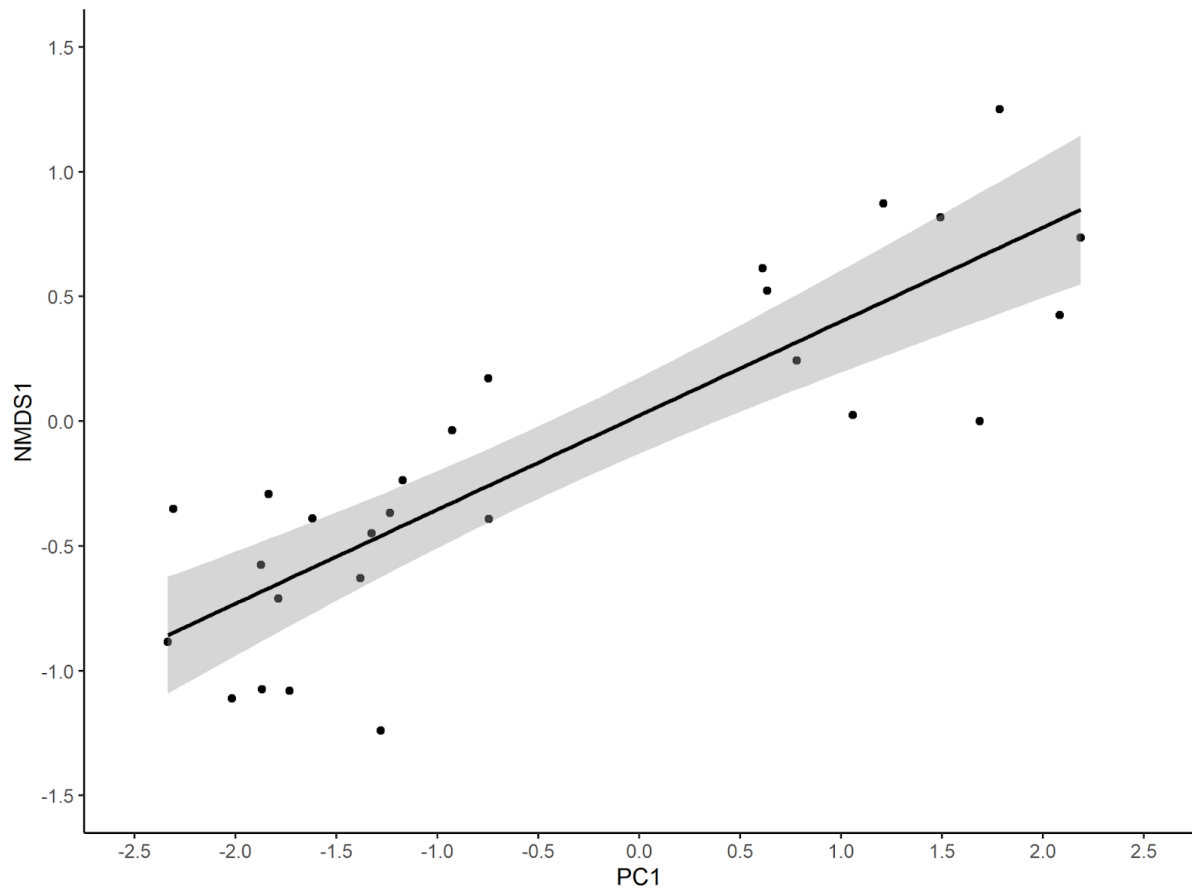

Figure S2. Pimplinae community composition, as measured by the first axis of a Non-Metric Multidimensional Scaling analysis (NMDS1, Figure S1) across 30 traps, against the first Principal Component (PC1) of the habitat variables at those traps (Table S6). The line is the linear regression ( $\pm$  95% CI in grey). The figure demonstrates that pimpline community composition is strongly associated with differences in habitat characteristics.
